# Supplementary material for: Meningococcal carriage 7 years after introduction of a serogroup A meningococcal conjugate vaccine in Burkina Faso: results from four cross-sectional carriage surveys
Source: PubMed Central journal article supplement (PMC7689286; doi:10.1016/s1473-3099(20)30239-5), 2020-12
Supplement: mmc1.pdf [file mmc1.pdf]

# THE LANCET

## Infectious Diseases

### Supplementary appendix

This appendix formed part of the original submission and has been peer reviewed. We post it as supplied by the authors.

Supplement to: Mbaeyi S, SampoE, DinanibK, et al. Meningococcal carriage 7 years after introduction of a serogroup A meningococcal conjugate vaccine in Burkina Faso: results from four cross-sectional carriage surveys. *Lancet Infect Dis* 2020; published online July 9. [https://doi.org/10.1016/S1473-3099\(20\)30239-5](https://doi.org/10.1016/S1473-3099(20)30239-5).

# **Meningococcal carriage 7 years after introduction of a serogroup A meningococcal conjugate vaccine in Burkina Faso: results from four cross-sectional carriage surveys**

## **Appendix**

### **Contents**

|                                                                                                                                   |   |
|-----------------------------------------------------------------------------------------------------------------------------------|---|
| Supplemental Figure 1. Detailed maps of Kaya and Ouahigouya villages and carriage evaluation sites – Burkina Faso, 2016–2017..... | 2 |
| Supplemental Figure 2. Schematic of carriage evaluation participant recruitment – Burkina Faso, 2016–2017.....                    | 3 |
| Supplemental Table 1. Results of external quality control (EQC) testing by round – Burkina Faso, 2016–2017.....                   | 4 |
| Supplemental Table 2. Prevalence of meningococcal carriage by district – Burkina Faso, 2016–2017.....                             | 5 |
| Supplemental table 3. Molecular typing profile of meningococcal isolates – Kaya and Ouahigouya districts, 2016–2017. ....         | 6 |

Supplemental Figure 1. Detailed maps of Kaya and Ouahigouya villages and carriage evaluation sites – Burkina Faso, 2016–2017.

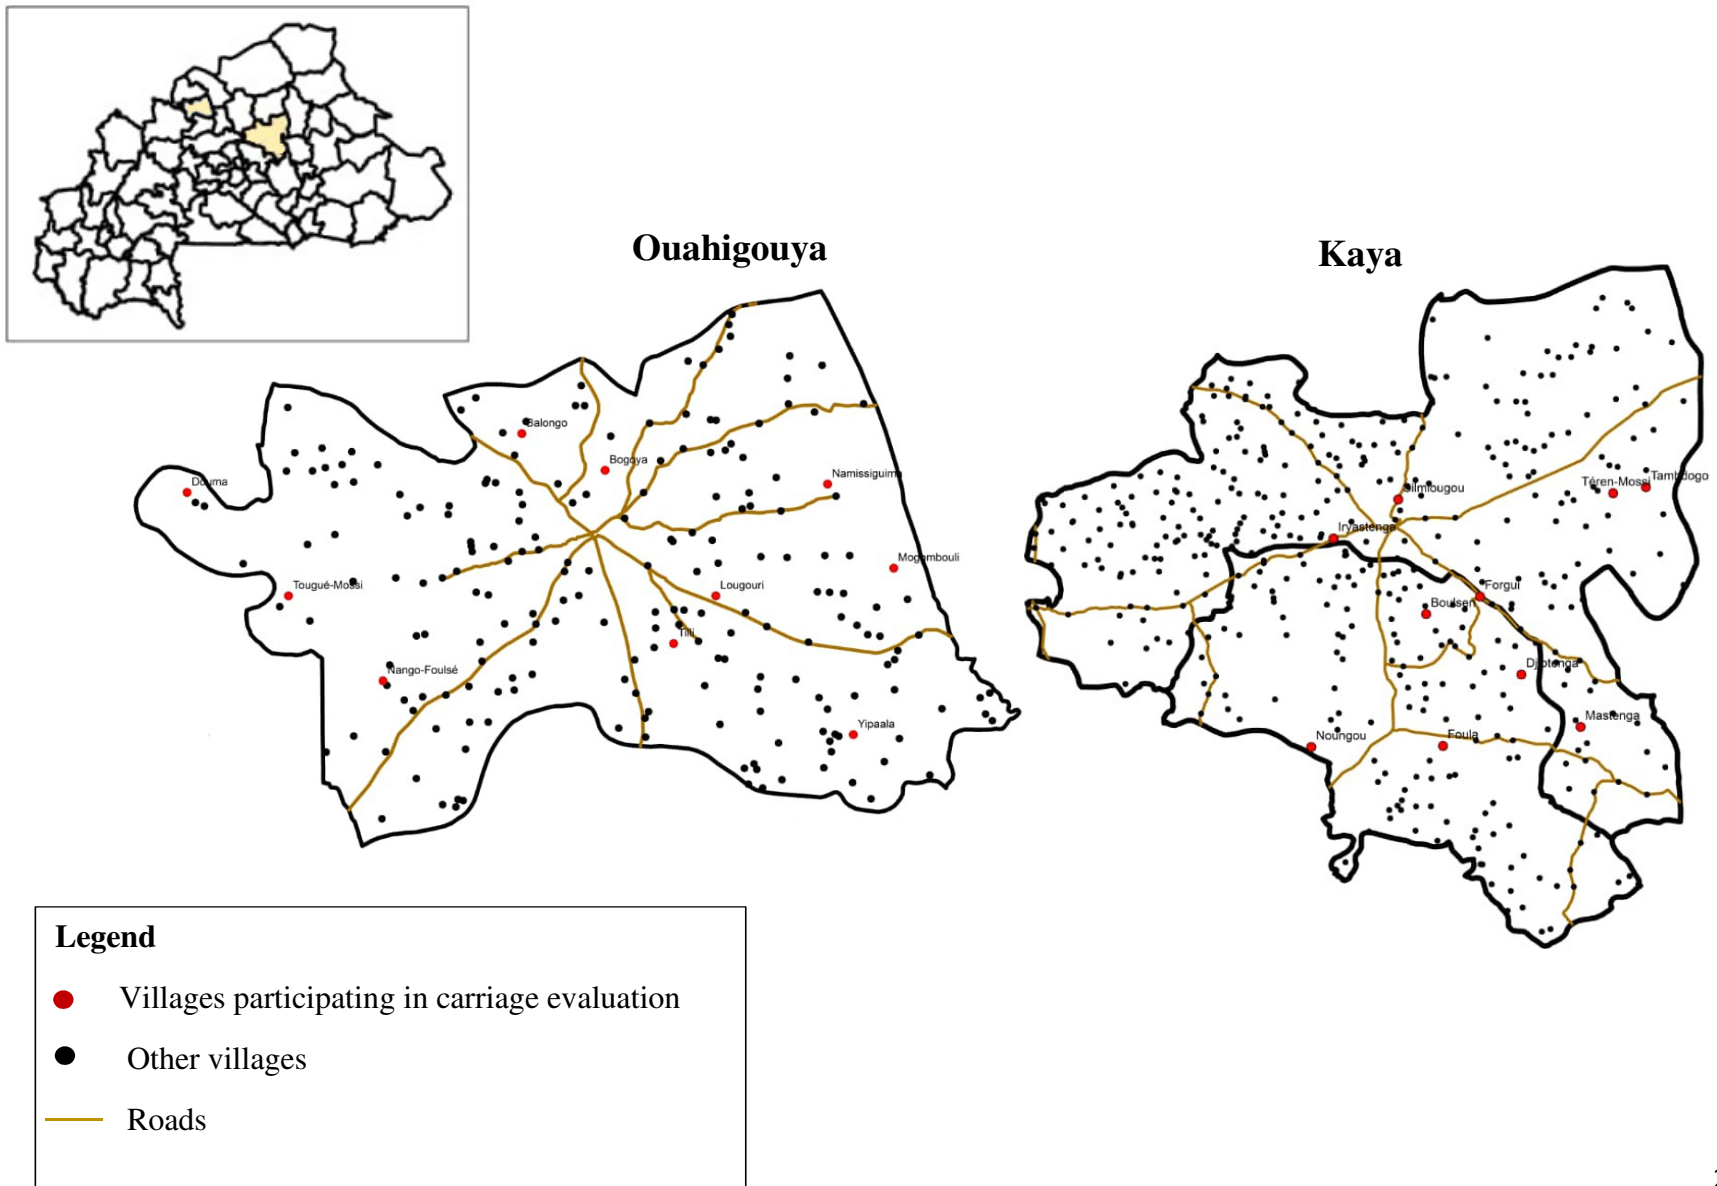

In 2016, the district of Kaya split into two districts to form the new district of Boussouma; however, for the purposes of this evaluation, Kaya district boundaries corresponds to the original Kaya district before subdivision of district into Kaya and Boussouma districts.

Supplemental Figure 2. Schematic of carriage evaluation participant recruitment – Burkina Faso, 2016–2017.

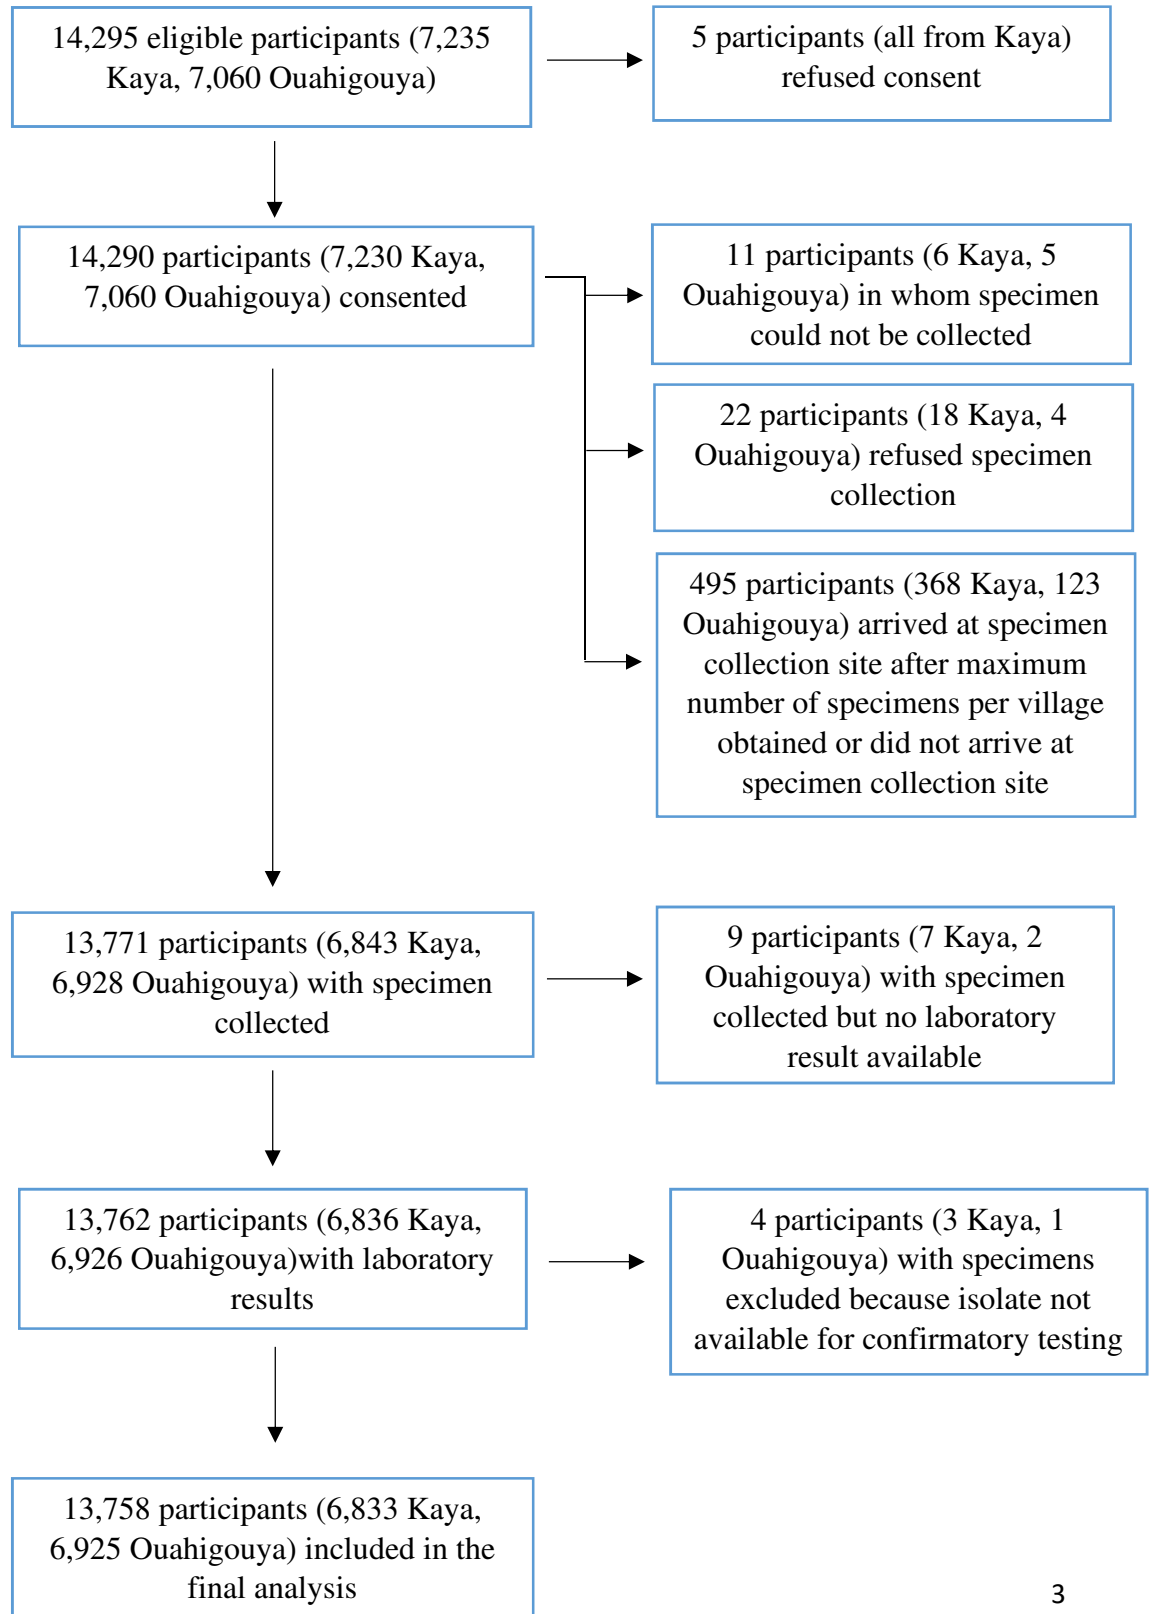

Supplemental Table 1. Results of external quality control (EQC) testing by round – Burkina Faso, 2016–2017.

|                                                                                                                                                                              | Round 1 | Round 2 | Round 3 | Round 4 |
|------------------------------------------------------------------------------------------------------------------------------------------------------------------------------|---------|---------|---------|---------|
| N. samples analyzed                                                                                                                                                          | 3,415   | 3,467   | 3,467   | 3,409   |
| <b>Morphology step: screening of samples where no colonies morphologically resembling <i>N. meningitidis</i> identified</b>                                                  |         |         |         |         |
| N. samples with suspect colonies <sup>a</sup>                                                                                                                                | 1,332   | 986     | 979     | 1,007   |
| N. samples without suspect colonies                                                                                                                                          | 2,083   | 2,481   | 2,488   | 2,402   |
| N. samples without suspect colonies analyzed by EQC                                                                                                                          | 50      | 50      | 50      | 50      |
| <i>N. meningitidis</i>                                                                                                                                                       | 0       | 0       | 0       | 0       |
| <b>Galactosidase (ONPG)/Glutamyl transferase (GGT) activity step: screening of isolates with enzymatic profile different from <i>Neisseria meningitidis</i> (ONPG–/GGT+)</b> |         |         |         |         |
| N. oxidase-positive, Gram-negative diplococci analyzed                                                                                                                       | 771     | 860     | 847     | 873     |
| N. ONPG–/GGT+ isolates                                                                                                                                                       | 242     | 211     | 352     | 327     |
| N. ONPG+/GGT+ or ONPG–/GGT– isolates                                                                                                                                         | 105     | 205     | 139     | 64      |
| N. ONPG+/GGT+ or ONPG–/GGT– isolates analyzed by EQC                                                                                                                         | 105     | 205     | 139     | 64      |
| <i>N. meningitidis</i>                                                                                                                                                       | 13      | 0       | 0       | 0       |
| <b>Sensitivity and specificity of laboratory analysis performed in Burkina Faso</b>                                                                                          |         |         |         |         |
| Sensitivity <sup>b</sup>                                                                                                                                                     | 93.0%   | 99.4%   | 99.7%   | 99.4%   |
| Specificity <sup>c</sup>                                                                                                                                                     | 97.8%   | 98.9%   | 99.9%   | 99.8%   |

<sup>a</sup> Suspect colonies are colonies growing on selective agar morphologically resembling *N. meningitidis*.

Sensitivity and specificity for *N. meningitidis* identification calculated by comparing preliminary results from laboratory testing in Burkina Faso to the final results from EQC testing:

Sensitivity= number of true positives/(true positives+false negatives)

Specificity=number of true negatives/(true negatives+false positives)

Supplemental Table 2. Prevalence of meningococcal carriage by district – Burkina Faso, 2016–2017.

| Characteristic   | Kaya                     |            | Ouahigouya               |            |
|------------------|--------------------------|------------|--------------------------|------------|
|                  | Carriage prevalence* (%) | 95% CI     | Carriage prevalence* (%) | 95% CI     |
| <b>Overall</b>   | 9.14                     | 6.01–12.27 | 5.44                     | 4.18–6.69  |
| <b>Round</b>     |                          |            |                          |            |
| 1                | 3.12                     | 0.00–6.56  | 6.78                     | 5.22–8.35  |
| 2                | 2.23                     | 0.38–4.09  | 7.88                     | 5.40–10.37 |
| 3                | 16.48                    | 8.54–24.43 | 3.67                     | 2.26–5.07  |
| 4                | 13.98                    | 4.64–23.32 | 3.24                     | 2.33–4.16  |
| <b>Season</b>    |                          |            |                          |            |
| Dry              | 10.08                    | 6.88–13.29 | 5.19                     | 3.84–6.54  |
| Rainy            | 8.28                     | 3.77–12.80 | 5.67                     | 3.80–7.54  |
| <b>Age group</b> |                          |            |                          |            |
| 9–11 months      | 5.19                     | 0.00–16.26 | 1.78                     | 0.00–4.43  |
| 1–4 years        | 5.90                     | 2.33–9.46  | 2.48                     | 1.51–3.44  |
| 5–9 years        | 10.11                    | 5.87–14.35 | 5.14                     | 2.99–7.28  |
| 10–14 years      | 11.20                    | 7.54–14.86 | 9.30                     | 5.70–12.89 |
| 15–19 years      | 10.89                    | 3.39–18.40 | 8.21                     | 6.14–10.27 |
| 20–24 years      | 7.08                     | 2.41–11.74 | 5.12                     | 3.24–6.99  |
| 25–29 years      | 11.83                    | 5.39–18.26 | 5.04                     | 1.51–8.58  |
| 30–36 years      | 8.75                     | 0.43–17.07 | 3.28                     | 0.09–6.47  |
| <b>Sex</b>       |                          |            |                          |            |
| Female           | 8.89                     | 4.66–13.12 | 5.36                     | 3.30–7.42  |
| Male             | 9.42                     | 6.42–12.42 | 5.53                     | 4.31–6.75  |
| <b>Serogroup</b> |                          |            |                          |            |
| C                | 0.06                     | 0.00–0.11  | 0.15                     | 0.00–0.35  |
| E                | 0.00                     | ..         | 0.08                     | 0.00–0.20  |
| W                | 0.82                     | 0.00–1.71  | 0.01                     | 0.00–0.02  |
| Nongroupable     | 8.26                     | 4.28–12.24 | 5.20                     | 3.75–6.65  |

\*Carriage prevalence estimates accounting for complex survey design

Supplemental table 3. Molecular typing profile of meningococcal isolates – Kaya and Ouahigouya districts, 2016–2017.

| Serogroup  | Clonal complex | Sequence type | PorA                    | FetA        | N. isolates |   |
|------------|----------------|---------------|-------------------------|-------------|-------------|---|
| C          | CC10217        | 10217         | P1.21-15;16             | F1-7        | 4           |   |
|            |                | 12446         |                         |             | 3           |   |
|            |                | 13402         |                         |             | 2           |   |
|            | CC41/44        | 7376          | P1.18-3;1               | F1-100      | 4           |   |
| E          | CC178          | 188           | P1.19;15                | F1-18       | 2           |   |
|            |                | 13407         |                         |             | 1           |   |
|            | Unassigned     | 9945          | P1.21;16-14             | F3-6        | 2           |   |
| W          | CC11/ET-37     | 11            | P1.5;2                  | F1-1        | 81          |   |
|            |                |               | P1.5;2-67               |             | 2           |   |
| NG         | CC192          | 192           | P1.18-11;42-1           | Not present | 647         |   |
|            |                |               | P1.18-46;42-1           |             | 61          |   |
|            |                |               | P1.18-11;42-11          |             | 18          |   |
|            |                |               | New                     |             | 3           |   |
|            |                |               | P1.18-11;42-8           |             | 2           |   |
|            |                |               | P1.18-11;42-2           |             | 1           |   |
|            |                |               | P1.18-11;42-3           |             | 1           |   |
|            |                |               | P1.18-11;42-5           |             | 1           |   |
|            |                |               | P1.Peptide not found;42 |             | 1           |   |
|            |                |               | 13199                   |             | 77          |   |
|            | 13404          | 7             |                         |             |             |   |
|            | 14388          | 1             |                         |             |             |   |
|            | 14389          | 1             |                         |             |             |   |
|            | 13802          | 1             |                         |             |             |   |
|            | CC175          | 175           | P1.22-11;15-25          | F5-1        | 84          |   |
|            |                | 2881          |                         | F1-31       | 1           |   |
|            | CC11/ET-37     | 11            | P1.5;2                  | F5-1        | 2           |   |
|            |                |               |                         | P1.5-1;2-36 | 2           |   |
|            | CC178          | 13407         | P1.19;15                | P1.5-1;2-74 | 1           |   |
|            |                |               |                         | 188         | 1           |   |
|            | CC10217        | 10217         | P1.21-15;16             | F1-1        | 1           |   |
|            |                |               |                         | 13402       | 1           |   |
|            | CC35           | 35            | P1.22-1;14              | F4-1        | 1           |   |
| CC41/44    | 7376           | P1.18-3;1     | F1-100                  | 1           |             |   |
| Unassigned | Unassigned     | 6924          | P1.21-14;28-3           | F5-66       | 5           |   |
|            |                |               |                         |             | 12718       | 1 |
|            |                |               |                         |             | 8248        | 1 |
|            |                | 13386         | P1.22;14-6              | 1           |             |   |
|            |                | 9945          | P1.21;16-14             | F3-6        | 1           |   |
|            |                | 13402         | P1.22;14-6              | F5-66       | 1           |   |
